# Supplementary material for: Long Term Exposure to Virgin and Recycled LDPE Microplastics Induced Minor Effects in the Freshwater and Terrestrial Crustaceans Daphnia magna and Porcellio scaber
Source: PubMed Central journal article supplement (PMC7958955; doi:10.3390/polym13050771), 2021-03-02
Supplement: polymers-13-00771-s001.pdf [file polymers-13-00771-s001.pdf]

*Supplementary information*

# Long Term Exposure to Virgin and Recycled LDPE Microplastics Induced Minor Effects in the Freshwater and Terrestrial Crustaceans *Daphnia magna* and *Porcellio scaber*

Anita Jemec Kokalj <sup>1</sup>, Andraž Dolar <sup>1</sup>, Jelizaveta Titova <sup>2</sup>, Meeri Visnapuu <sup>3</sup>, Luka Škrlep <sup>4</sup>, Damjana Drobne <sup>1</sup>, Heiki Vija <sup>2</sup>, Vambola Kisand <sup>3</sup> and Margit Heinlaan <sup>2,\*</sup>

<sup>1</sup> University of Ljubljana; Biotechnical faculty; Department of Biology; Večna pot 111; 1000 Ljubljana; Slovenia; anita.jemec@bf.uni-lj.si (A.J.K.); Andraz.Dolar@bf.uni-lj.si (A.D.); damjana.drobne@bf.uni-lj.si (D.D.)

<sup>2</sup> Laboratory of Environmental Toxicology; National Institute of Chemical Physics and Biophysics; Akadeemia tee 23; 12618 Tallinn; Estonia; jelizaveta.titova@kbfi.ee (J.T.); heiki.vija@kbfi.ee (H.V.); [margit.heinlaan@kbfi.ee](mailto:margit.heinlaan@kbfi.ee) (M.H.)

<sup>3</sup> Institute of Physics; University of Tartu; W. Ostwaldi Str 1; 50411 Tartu; Estonia; meeri.visnapuu@ut.ee (M.V.); vambola.kisand@ut.ee (V.K.)

<sup>4</sup> Slovenian National Building and Civil Engineering Institute; Dimičeva ulica 12; 1000 Ljubljana; Slovenia

\* Correspondence: [margit.heinlaan@kbfi.ee](mailto:margit.heinlaan@kbfi.ee)

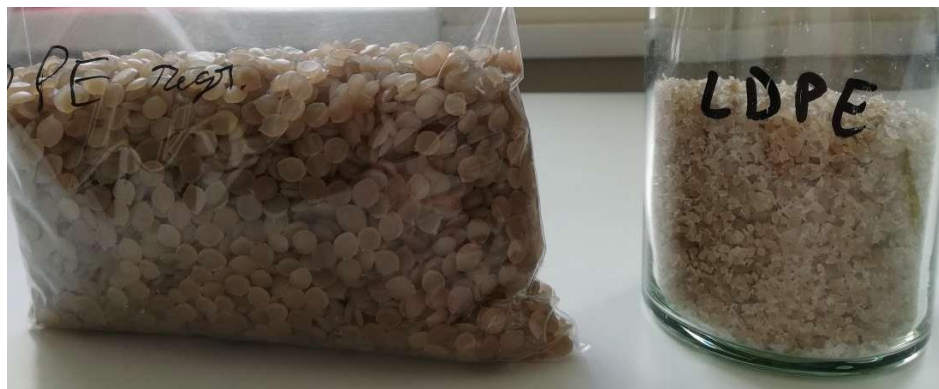

**Figure S1.** Pellets (left) of recycled LDPE (recyclate of transparent mostly label-free packaging film) and the fragments (right) from the first milling (Retsch SM100). For the current study, fragments from the first milling were further milled into smaller (<500  $\mu\text{m}$ ) fractions (Figure S2).

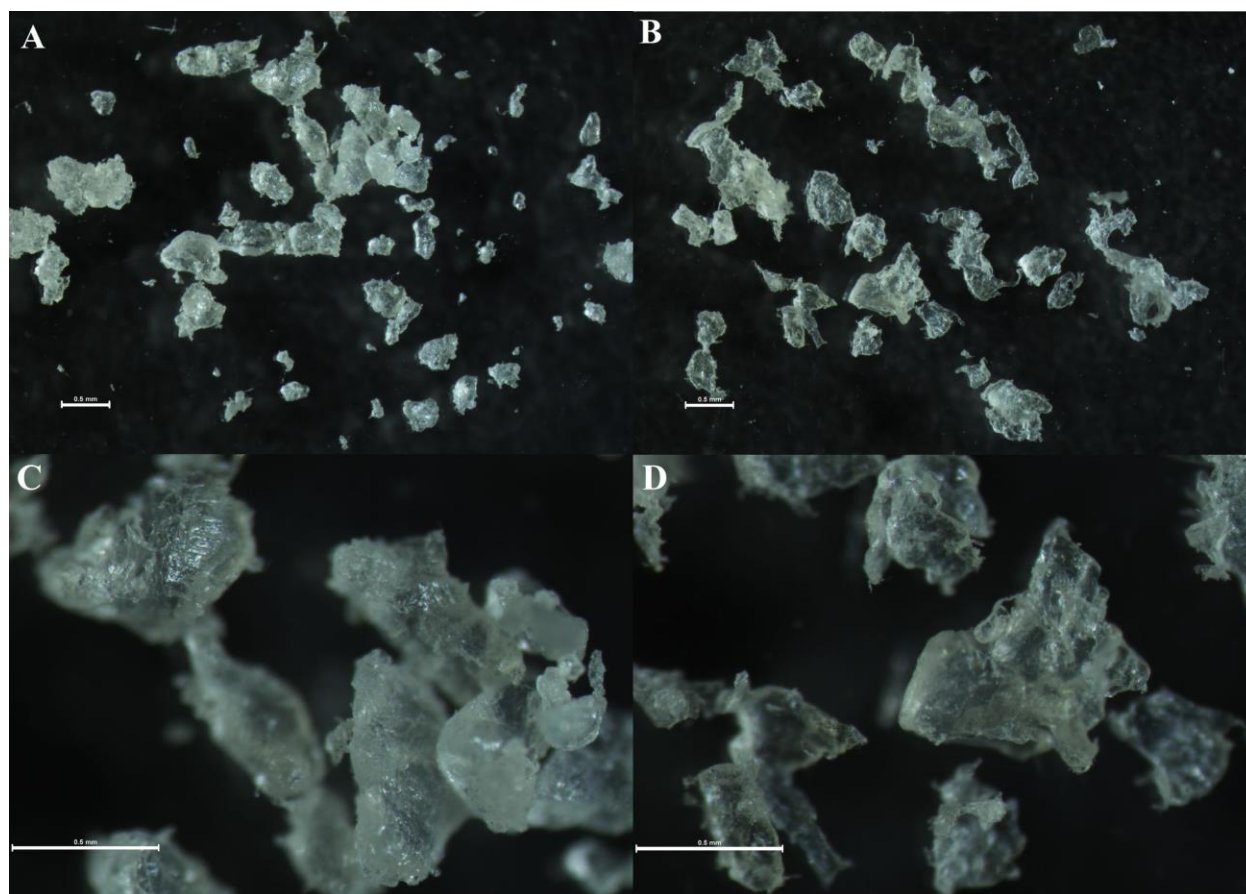

**Figure S2.** Virgin (A, C) and recycled (B, D) LDPE microplastics in stereomicroscope Nikon SMZ1270. Scale bar equals 0.5 mm.

**Table S1.** Properties of Lufa 2.2 test soil (Lufa, Speyer, city, country), provided by the supplier.

| Parameter                                          | Mean $\pm$ Standard deviation        |
|----------------------------------------------------|--------------------------------------|
| Soil type                                          | Loamy sand (DIN) / Sandy loam (USDA) |
| Organic carbon (% C)                               | 1.73 $\pm$ 0.27                      |
| Nitrogen (% N)                                     | 0.19 $\pm$ 0.03                      |
| pH (0.01 M CaCl <sub>2</sub> )                     | 5.6 $\pm$ 0.4                        |
| Cation exchange capacity (cmolc kg <sup>-1</sup> ) | 9.8 $\pm$ 0.5                        |
| Water holding capacity (%)                         | 45.8 $\pm$ 1.9                       |
| Weight per volume (g / 100 ml)                     | 1201 $\pm$ 41                        |

## Effects of microplastics on soil moisture

In a preliminary experiment we noticed that the moisture in test jars with woodlice changed in a different manner than in the control exposure. Therefore we performed a separate preliminary experiment to check how the soil moisture changed if it was not adjusted to 40% water holding capacity. For this purpose, 3 jars per three selected microplastics (MP) concentrations (0.06%, 0.5% and 1.5% w/w) were filled with the same mass of soil as for the tests with animals. The jars were incubated for 4 days at constant temperature ( $20 \pm 2$  °C) and illumination (16:8 h, light:dark) in a climate-controlled chamber. We noticed that the loss of water was lower at 0.5% of recycled LDPE and higher at 1.5% w/w of virgin LDPE (Figure S3) although the difference could not be statistically tested due to low number of replicates (n=3). This indicates a possibility that virgin and recycled MP affect the soil property, which has also been previously shown for other types of MP [81]. In soil, LDPE fragments have been shown to harbor unique microbial communities that could potentially alter the soil ecological functions and biogeochemical processes [82]. The outcome of this preliminary experiment was taken into consideration during the exposure with woodlice. Special care was taken to adjust the replenished water to desired 40% water holding capacity on a daily basis.

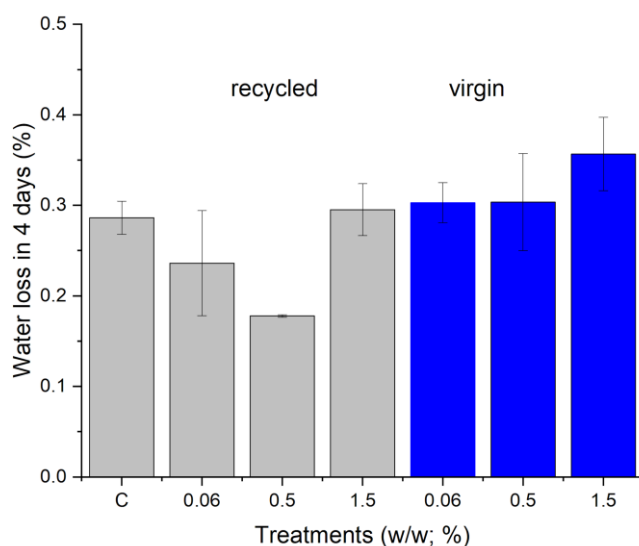

**Figure S3.** Change in soil moisture in the control and at different concentrations of microplastics exposure (virgin and recycled LDPE) after 4 days.

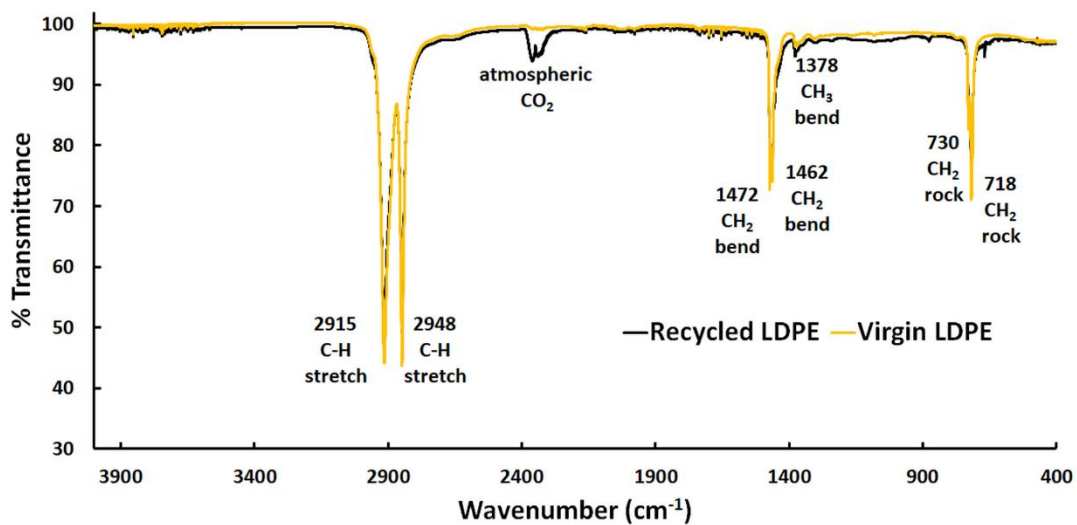

**Figure S4.** ATR-FTIR spectra of virgin LDPE (yellow line) and recycled LDPE (black line) powders. Characteristic absorption bands (cm<sup>-1</sup>) and the corresponding vibration modes used to identify the polymers as LDPE are marked.

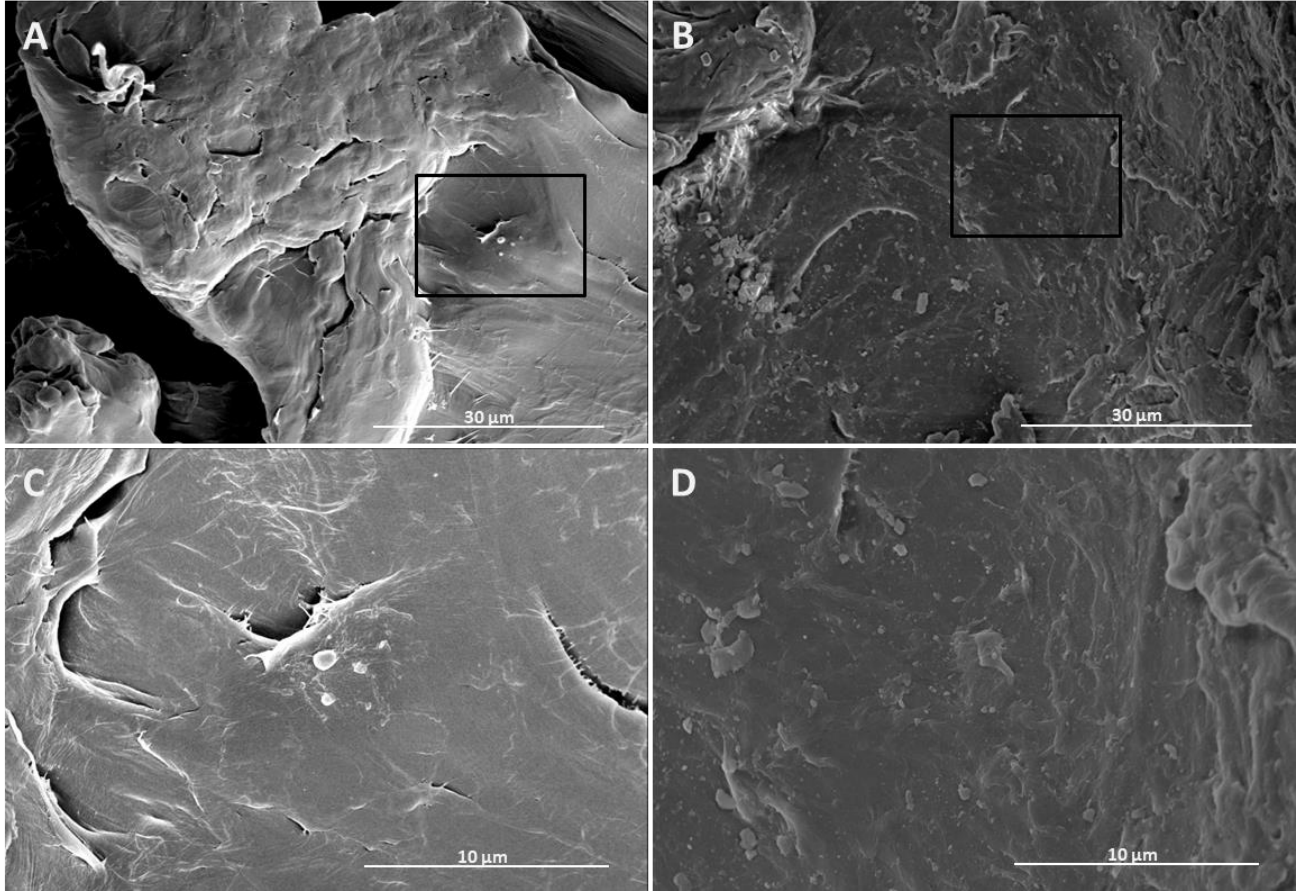

**Figure S5.** Scanning Electron Microscope images of the surface structures of virgin (A, C) and recycled (B; D) LDPE microplastics. Higher magnifications (C and D) are taken from the insets (black squares) on the upper panel.

**Table S2.** Collected test statistics on the effects of the virgin LDPE alone on the woodlice (*Porcellio scaber*) exposed to 0.02%, 0.06%, 0.17%, 0.5% and 1.5% (w/w) virgin LDPE in Lufa 2.2 soil. Normality was tested with Kolmogorov-Smirnov tests, and homogeneity of the variances was verified with Levene tests. For data with parametric distribution and homoscedasticity, one-way ANOVA followed by Tukey tests was performed, while for data with non-parametric distribution or not achieving homoscedasticity, non-parametric Kruskal-Wallis tests followed by pairwise comparisons with the control was performed using Mann-Whitney U-tests.

| Parameter             | ANOVA |       | Kruskal-Wallis |       | Pairwise comparisons with the control<br>(Tukey or Mann-Whitney U-tests, see Methods) |       |           |       |           |       |          |       |          |       |
|-----------------------|-------|-------|----------------|-------|---------------------------------------------------------------------------------------|-------|-----------|-------|-----------|-------|----------|-------|----------|-------|
|                       | F     | p     | $\chi^2$       | p     | 0.02% w/w                                                                             |       | 0.06% w/w |       | 0.17% w/w |       | 0.5% w/w |       | 1.5% w/w |       |
|                       |       |       |                |       | U                                                                                     | p     | U         | p     | U         | p     | U        | p     | U        | p     |
| Survival              | -     | -     | 9.957          | 0.076 | 112.5                                                                                 | 1.000 | 105       | 0.351 | 105       | 0.351 | 135      | 0.157 | 112.5    | 1.000 |
| Feeding               | -     | -     | 18.074         | 0.003 | 58                                                                                    | 2.889 | 81        | 0.461 | 115       | 0.434 | 34       | 0.032 | 45       | 0.027 |
| Total haemocyte count | 2.751 | 0.035 | -              | -     | -                                                                                     | 0.999 | -         | 0.998 | -         | 0.941 | -        | 0.101 | -        | 0.672 |
| Haemocyte viability   | 1.169 | 0.346 | -              | -     | -                                                                                     | 0.697 | -         | 0.477 | -         | 0.730 | -        | 0.245 | -        | 0.742 |
| Semigranulocytes      | 3.152 | 0.020 | -              | -     | -                                                                                     | 0.783 | -         | 0.498 | -         | 0.813 | -        | 0.011 | -        | 0.115 |
| Granulocytes          | 4.167 | 0.005 | -              | -     | -                                                                                     | 0.867 | -         | 0.997 | -         | 0.984 | -        | 0.017 | -        | 0.038 |
| Hyalinocytes          | 1.994 | 0.106 | -              | -     | -                                                                                     | 0.997 | -         | 0.176 | -         | 0.866 | -        | 0.978 | -        | 0.999 |

-, not applicable

**Table S3.** Collected test statistics on the effects of the recycled LDPE alone on the woodlice (*Porcellio scaber*) exposed to 0.02%, 0.06%, 0.17%, 0.5% and 1.5% (w/w) recycled LDPE in Lufa 2.2 soil. Normality was tested with Kolmogorov-Smirnov tests, and homogeneity of the variances was verified with Levene tests. For data with parametric distribution and homoscedasticity, one-way ANOVA followed by Tukey tests was performed, while for data with non-parametric distribution or not achieving homoscedasticity, non-parametric Kruskal-Wallis tests followed by pairwise comparisons with the control was performed using Mann-Whitney U-tests.

| Parameter             | ANOVA |        | Kruskal-Wallis |       | Pairwise comparisons with the control<br>(Tukey or Mann-Whitney U-tests, see Methods) |       |           |       |           |       |          |       |          |       |
|-----------------------|-------|--------|----------------|-------|---------------------------------------------------------------------------------------|-------|-----------|-------|-----------|-------|----------|-------|----------|-------|
|                       | F     | p      | $\chi^2$       | p     | 0.02% w/w                                                                             |       | 0.06% w/w |       | 0.17% w/w |       | 0.5% w/w |       | 1.5% w/w |       |
|                       |       |        |                |       | U                                                                                     | p     | U         | p     | U         | p     | U        | p     | U        | p     |
| Survival              | -     | -      | 4.341          | 0.501 | 105                                                                                   | 0.577 | 105       | 0.577 | 97.5      | 0.164 | 120      | 0.653 | 105      | 0.577 |
| Feeding               | -     | -      | 3.382          | 0.641 | 112                                                                                   | 0.320 | 101       | 0.645 | 86        | 0.612 | 71       | 0.724 | 88       | 0.903 |
| Total haemocyte count | -     | -      | 2.899          | 0.716 | 37                                                                                    | 0.637 | 27        | 0.637 | 37        | 0.962 | 29       | 0.531 | 49       | 0.229 |
| Haemocyte viability   | 1.772 | 0.138  | -              | -     | -                                                                                     | 0.999 | -         | 0.998 | -         | 0.583 | -        | 0.998 | -        | 0.915 |
| Semigranulocytes      | 2.070 | 0.087  | -              | -     | -                                                                                     | 1.000 | -         | 0.828 | -         | 0.948 | -        | 0.479 | -        | 0.144 |
| Granulocytes          | 0.905 | 0.486  | -              | -     | -                                                                                     | 1.000 | -         | 0.823 | -         | 1.000 | -        | 0.872 | -        | 0.806 |
| Hyalinocytes          | 2.576 | 0.0392 | -              | -     | -                                                                                     | 0.998 | -         | 1.000 | -         | 0.441 | -        | 0.793 | -        | 0.202 |

-, not applicable

**Table S4.** TXRF-quantified concentrations of selected metals in *Daphnia magna* chronic reproduction assay treatments (100 mg recycled LDPE/L and untreated *D. magna* control). Metal concentrations are given as mg metal/L (AVG  $\pm$  SD, n=2). LOQ – Limit of Quantification.

| <i>D. magna</i> exposure medium |                        |                 |
|---------------------------------|------------------------|-----------------|
| Metal                           | 100 mg recycled LDPE/L | Control         |
| P                               | 0.45 $\pm$ 0.06        | 0.46 $\pm$ 0.03 |
| K                               | 2.09 $\pm$ 0.30        | 2.57 $\pm$ 0.98 |
| Ca                              | 36.4 $\pm$ 2.20        | 36.7 $\pm$ 2.55 |
| Ti                              | <LOQ                   | <LOQ            |
| Fe                              | <LOQ                   | <LOQ            |
| Cu                              | <LOQ                   | <LOQ            |
| Zn                              | <LOQ                   | <LOQ            |
| Pb                              | <LOQ                   | <LOQ            |

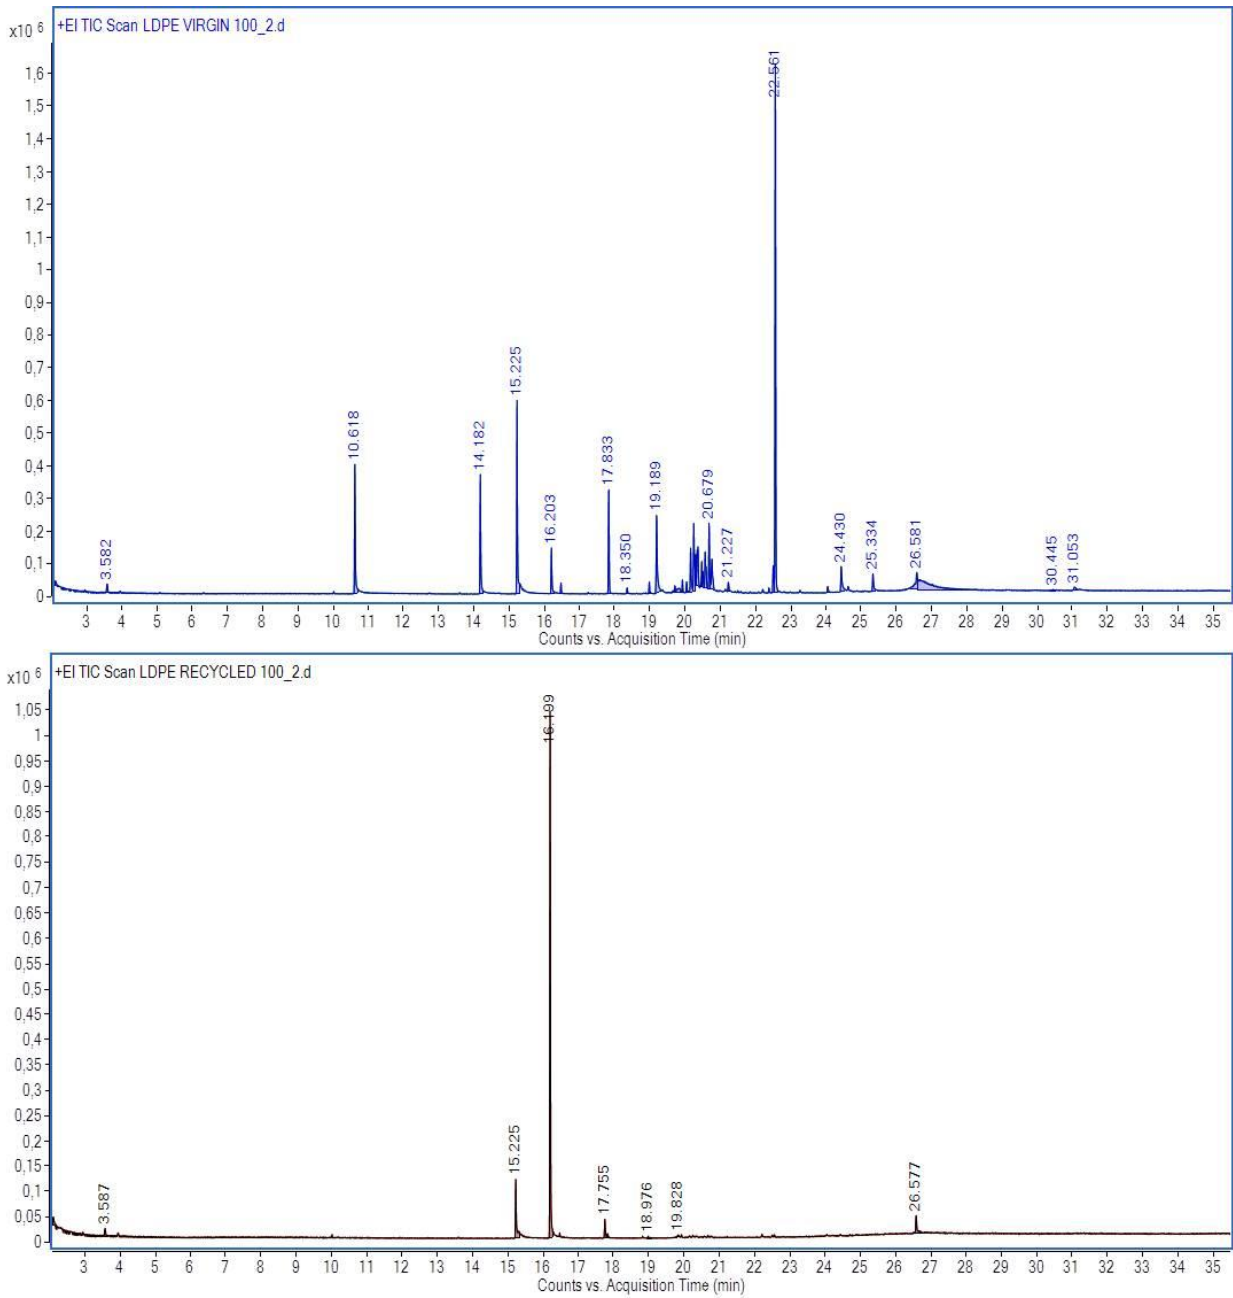

**Figure S6.** GC-MS chromatogram of virgin (top) and recycled (bottom) LDPE. Methanol extraction was used to prepare the samples.



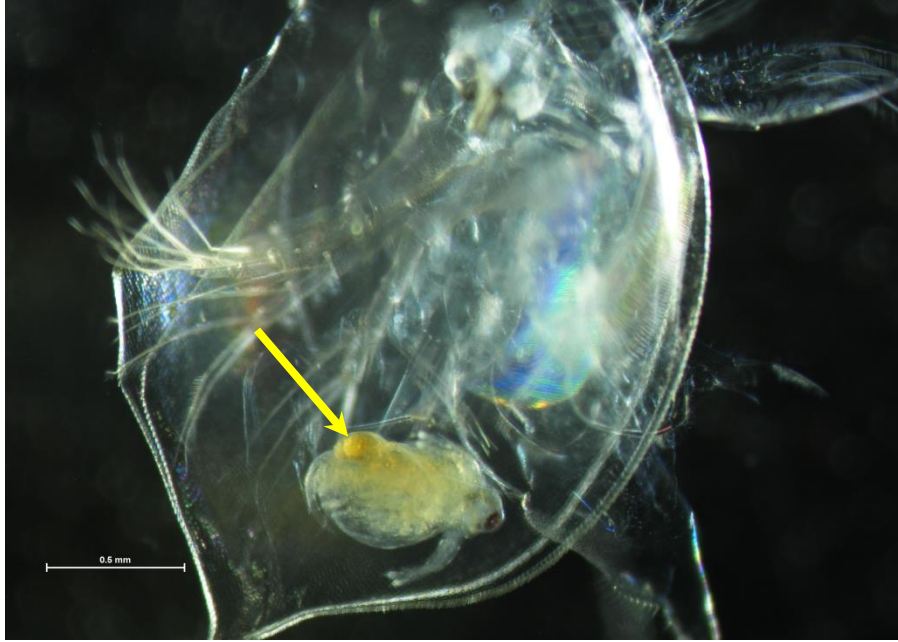

**Figure S7.** An embryo, retained in the shed carapace of *Daphnia magna* that had been exposed (18 days until this observation) to 100 mg/L of recycled LDPE. Yellow arrow indicates potential abnormalities of the embryo. Scale bar equals 0.5 mm.
